# Supplementary figures and images for: Draft genome analysis provides insights into the fiber yield, crude protein biosynthesis, and vegetative growth of domesticated ramie (Boehmeria nivea L. Gaud)
Source: Oxford University Press journal article supplement (doi:10.1093/dnares/dsx047), 2017-11-01

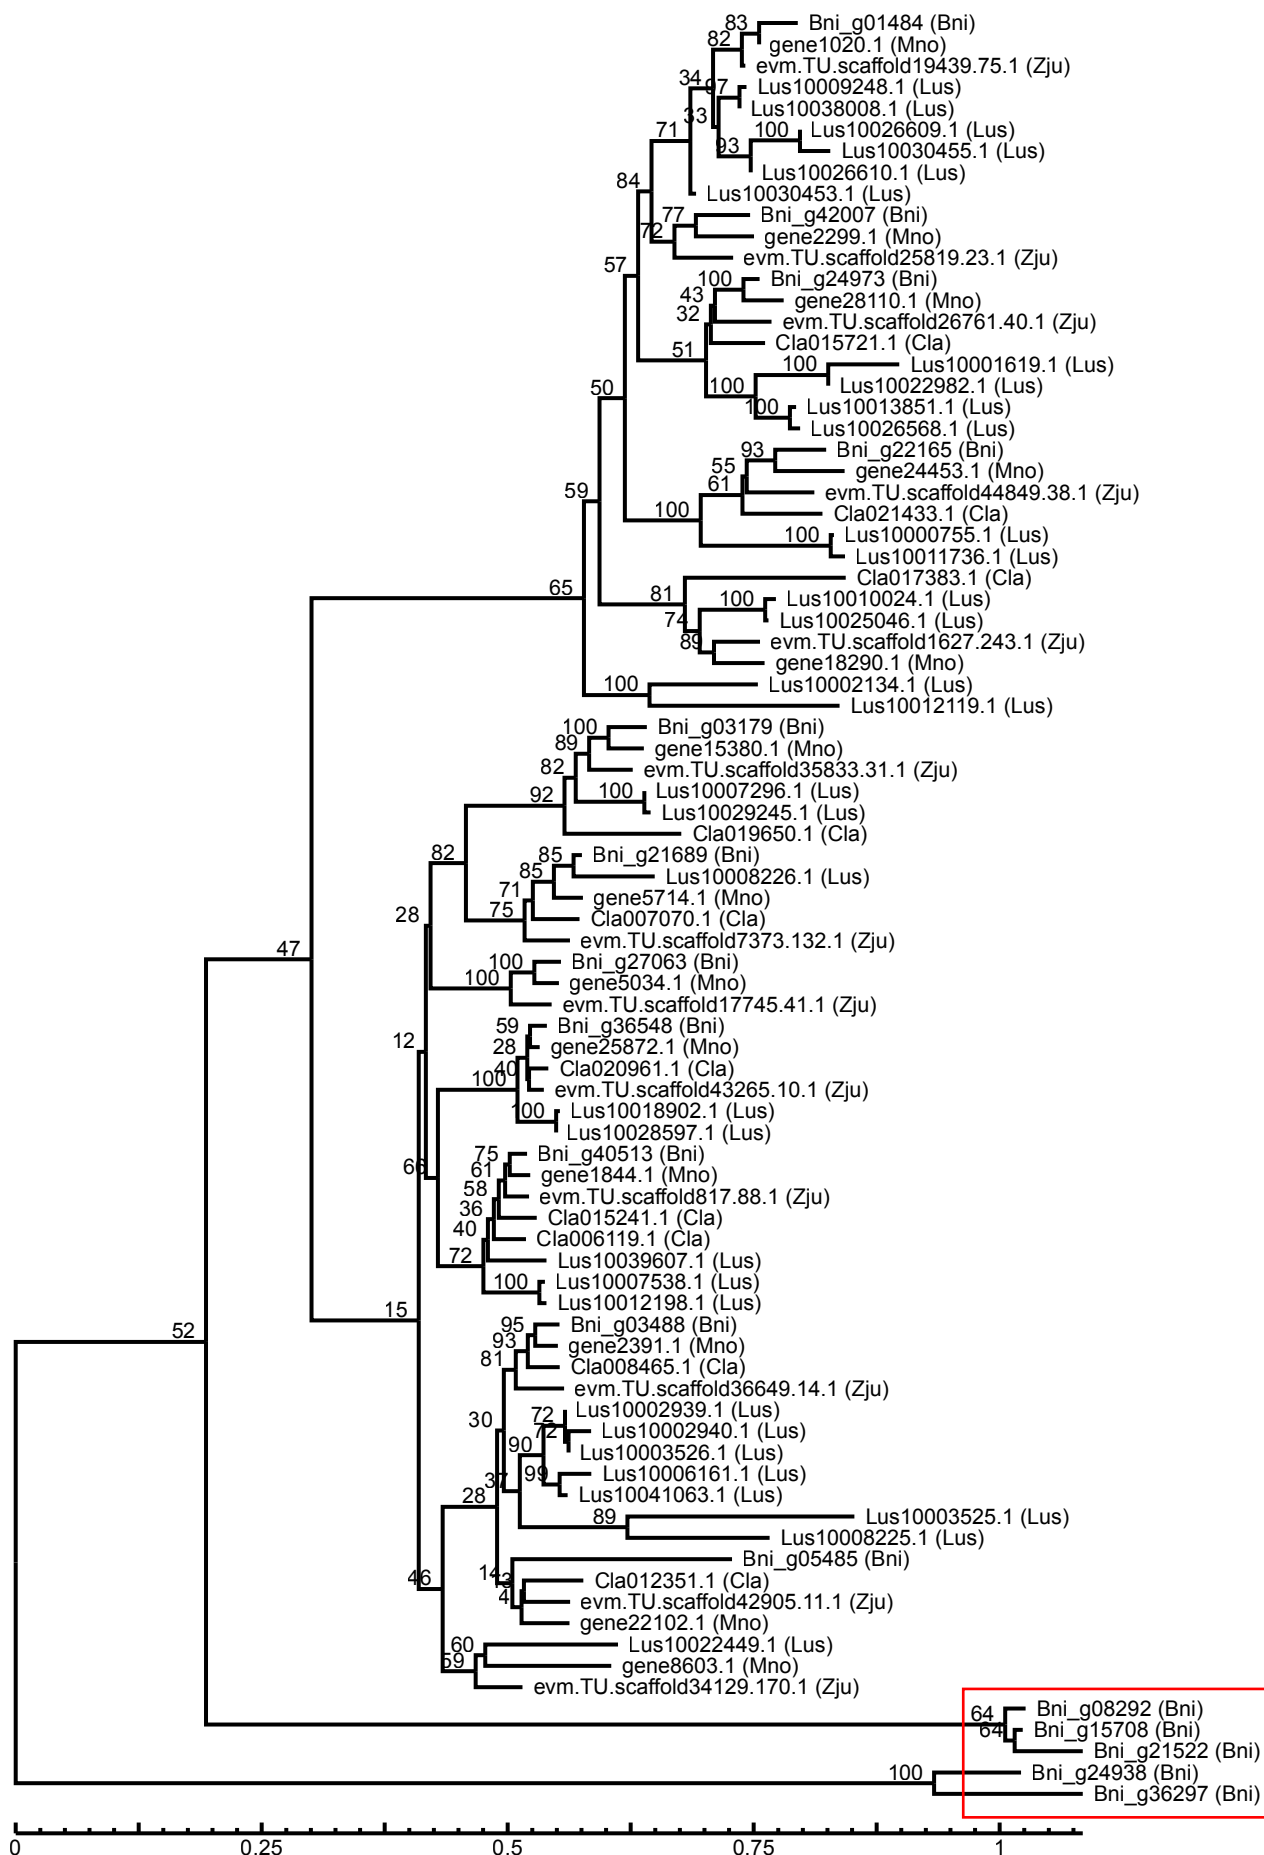

Supplement: dsx047_supp.zip [file dsx047_supp.zip]

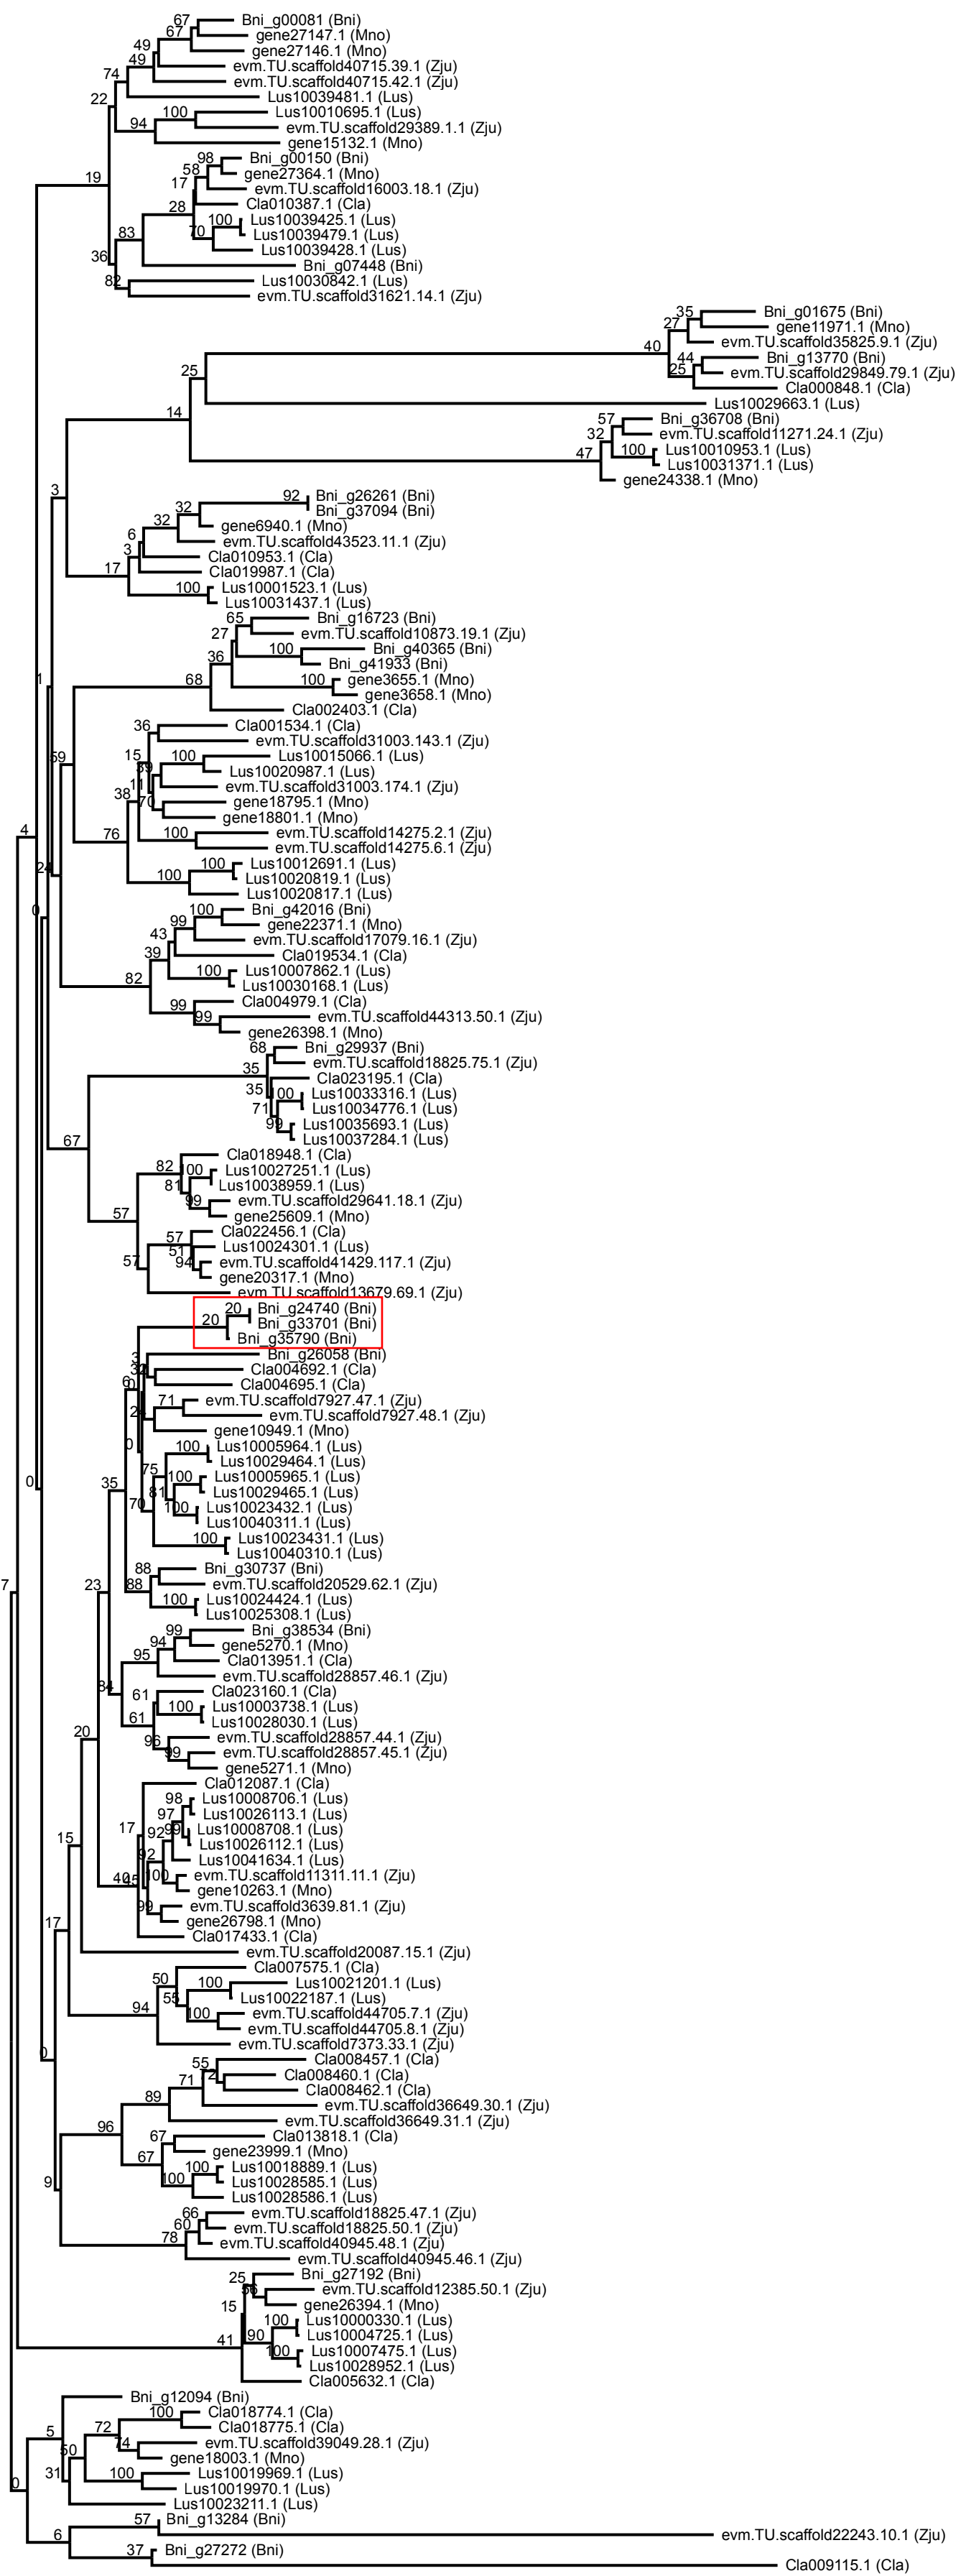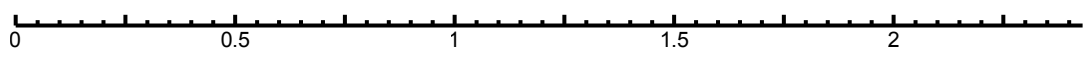

Supplement: dsx047_supp.zip [file dsx047_supp.zip]
